# Supplementary material for: Sibling rivalry among the ZBTB transcription factor family: homodimers versus heterodimers
Source: Life Sci Alliance. 2022 Sep 12;5(11):e202201474. doi: 10.26508/lsa.202201474 (PMC9468604; doi:10.26508/lsa.202201474)
Supplement: Supplementary file 1 [file LSA-2022-01474_TableS1.xlsx]

## Sheet: Sheet1
Table S1. List of cloning primers
OLIGONUCLEOTIDE NAME	SEQUENCE
BCL6-BTB-XhoI-Forward	TGGACTCGAGGGATGGCCTCGCCGGCTGACAG
BCL6-BTB-NotI-Reverse	GGACGCGGCCGCTTATTCACTGGCCTTAATAAACTTCCGGCAAG
KAISO-BTB-XhoI-Forward	TGGACTCGAGGGATGGAGAGTAGAAAACTGATTTCTGC
KAISO-BTB-NotI-Reverse	GGACGCGGCCGCTTACTGTGACAATGGGACACCAA
LRF-BTB-XhoI-Forward	TGGACTCGAGGGATGGCCGGCGGCGTGGA
LRF-BTB-NotI-Reverse	GGACGCGGCCGCTTAGATCTGCCGGTCCAGGAGGTCG
MIZ1-BTB- XhoI-Forward	TGGACTCGAGGGATGGACTTTCCCCAGCACAGCCAGC
MIZ1-BTB-NotI-Reverse	GGACGCGGCCGCTTAAGCAAGTGACTTGAGGGCATGGCAG
PATZ2-BTB-XhoI-Forward	TGGACTCGAGGGATGGCAGAAACATCGCCAGAG
PATZ2-BTB-NotI-Reverse	GGACGCGGCCGCTTAGCTATGATTATTTTGGAAGTCTGTGTAAGC
PLZF-BTB-XhoI-Forward	TGGACTCGAGGGATGGATCTGACAAAAATGGGCATGA
PLZF-BTB-NotI-Reverse	GGACGCGGCCGCTTACTGGATGGTCTCCAGCATCTTCAG
PATZ1-BTB-XhoI-Forward	TGGACTCGAGGGATGGAGCGGGTCAACGACGCTTC
PATZ1-BTB-NotI-Reverse	GGACGCGGCCGCTTAGGACTGTTTGATTACTTCCTGGCAGATC
ThPOK-BTB-SmaI-Forward	TGGACCCGGGATGGGGAGCCCCGAGGATGAC
ThPOK-BTB-XhoI-Forward	TGGACTCGAGGGATGGGGAGCCCCGAGGATGACCTGATT
ThPOK-BTB-NotI-Reverse	GGACGCGGCCGCTTATTAACTGCCCTGCAGAATCTCCATGCAAGCA
CMV Forward	CGCAAATGGGCGGTAGGCGTG
TagGFP-XhoI&SmaI-Reverse	GGACCTCGAGGGACCCCGGGAGAACCGCTGTACAGCTCGTCCATGCC
LacI-GBP-Forward	TCAGCTAGCATGGCCGATGTGCAGCTGGT
LacI-GBP-Reverse	ATTGGATCCTCATCGGGAAACCTGTCGTGC
